# Supplementary material for: Anisamide-targeted gold nanoparticles for siRNA delivery in prostate cancer – synthesis, physicochemical characterisation and in vitro evaluation
Source: Royal Society of Chemistry journal article supplement (doi:10.1039/c6tb00082g), 2016-01-01

## Supplementary Material

**Figure S1.** ATR-FTIR spectra of the anisic acid, NHS and the obtained product activated anisic-NHS Ester

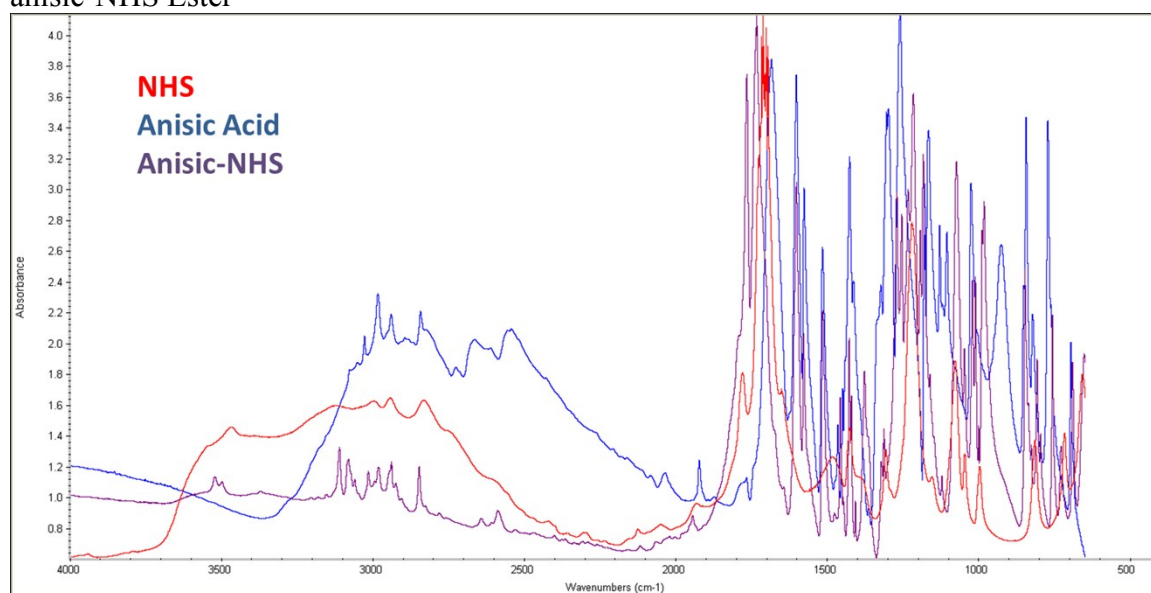

**Figure S2.** UV-vis absorption spectra of anisic-NHS. In order to verify that NHS activated anisic acid was attached onto Au-PEI, the resultant colloidal solution was centrifuged at 12,000 rpm at RT for 15 min. The anisic-NHS in the supernatant (red) was analysed using UV-visible spectroscopy. When compared to anisic-NHS prepared using a concentration of 69  $\mu$ M (blue, a concentration for the reaction initially), results indicated that more than 50 % of anisic-NHS had been grafted onto Au-PEI.

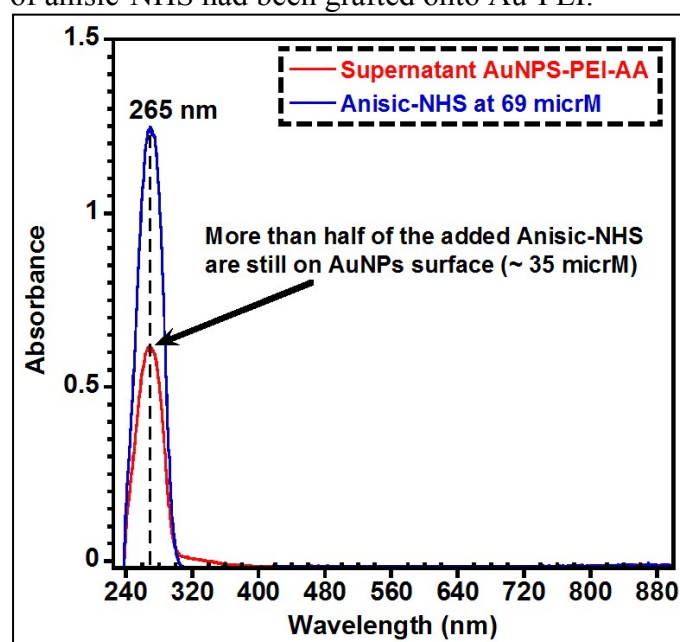

Supplement: c6tb00082g1.pdf [file c6tb00082g1.pdf]
